# Supplementary material
Source: publisher site journal article supplement (https://www.dovepress.com/article/297087)
Supplement: Supplementary file 1 [file get_supplementary_file.php]

**
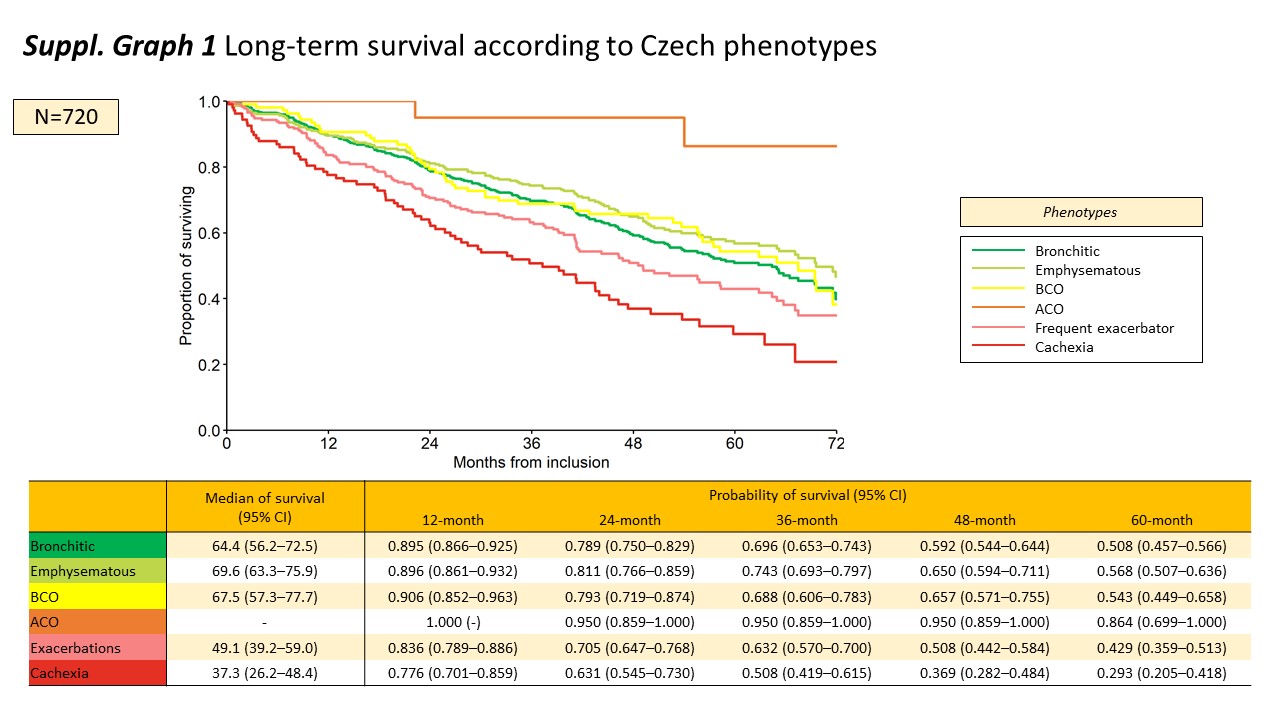
**

**
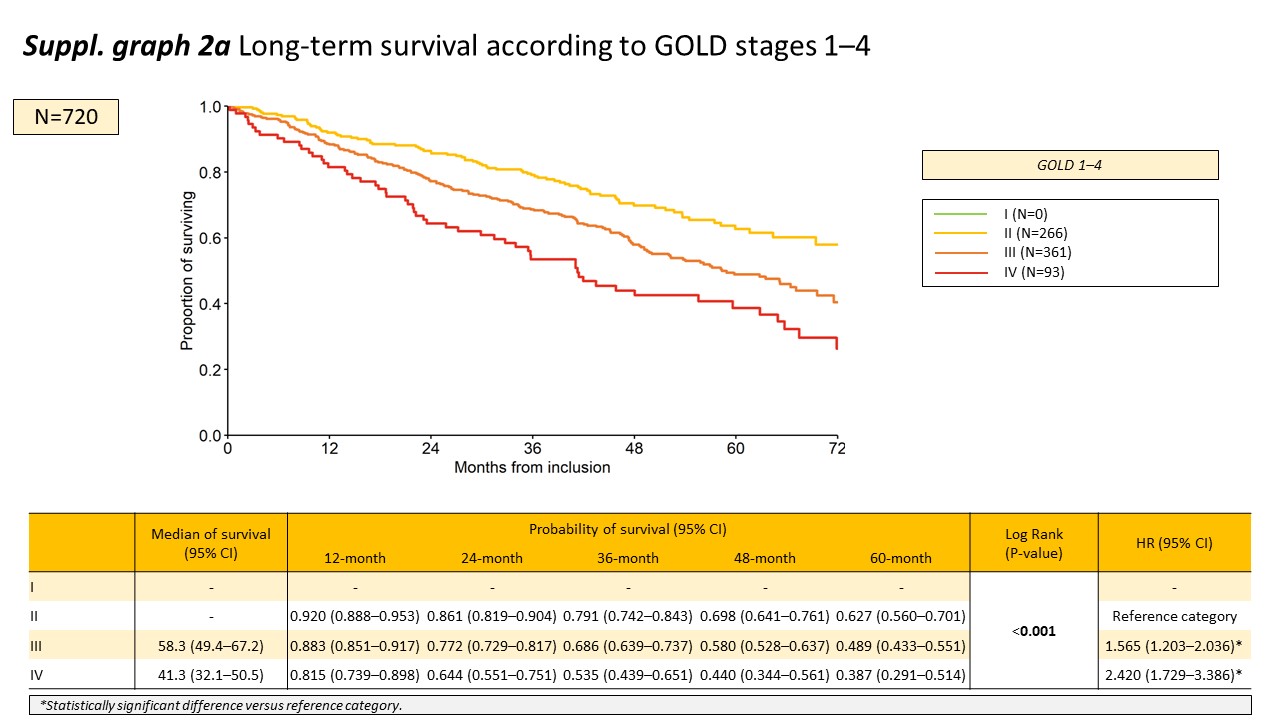
**

**
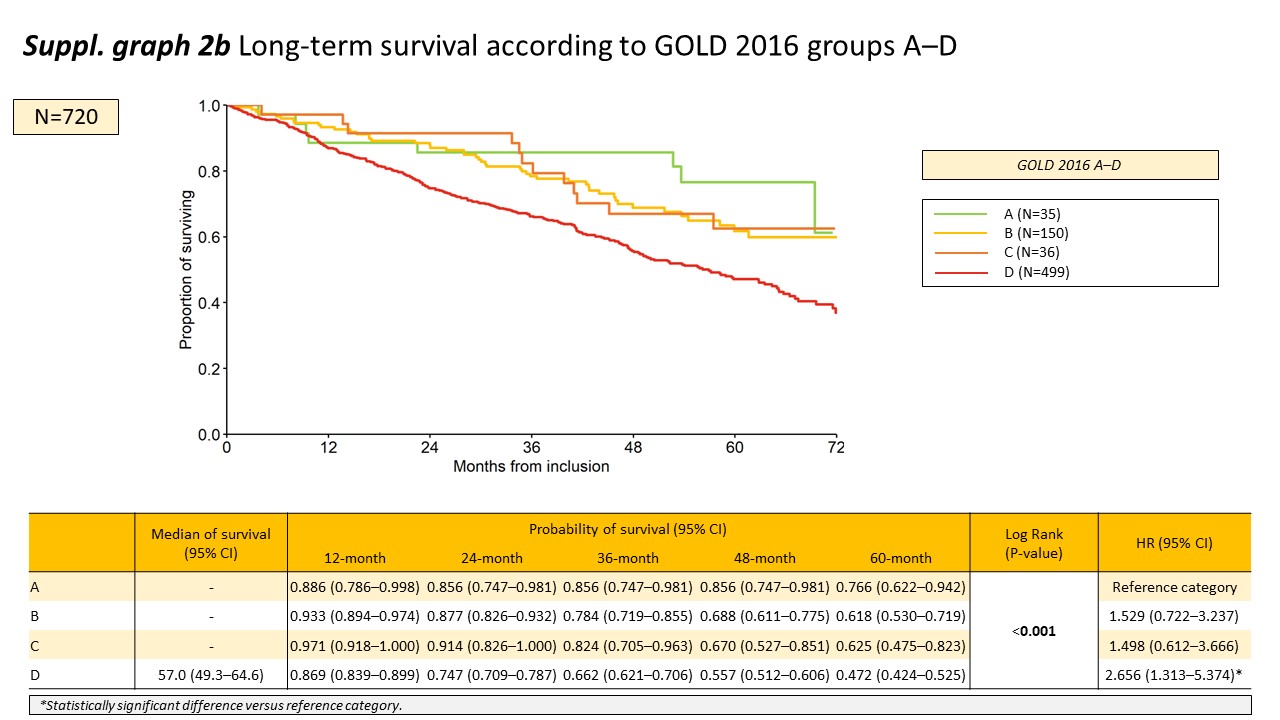
**

**
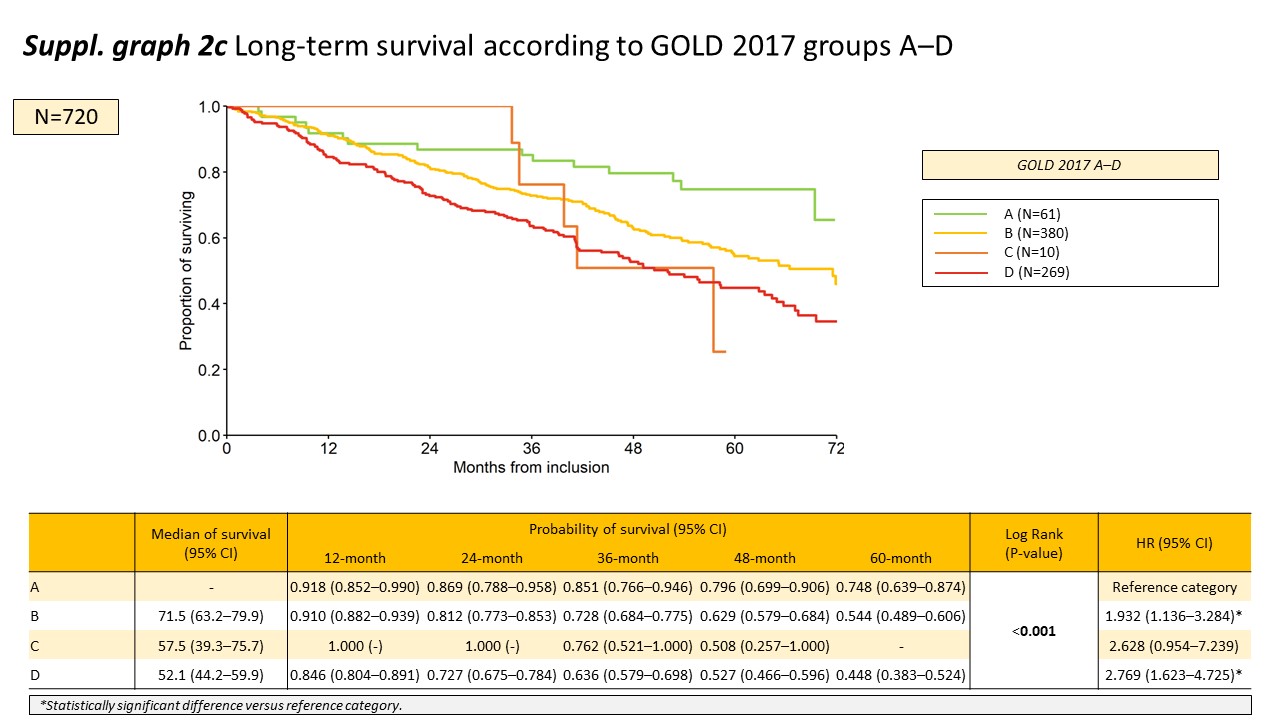
**

**
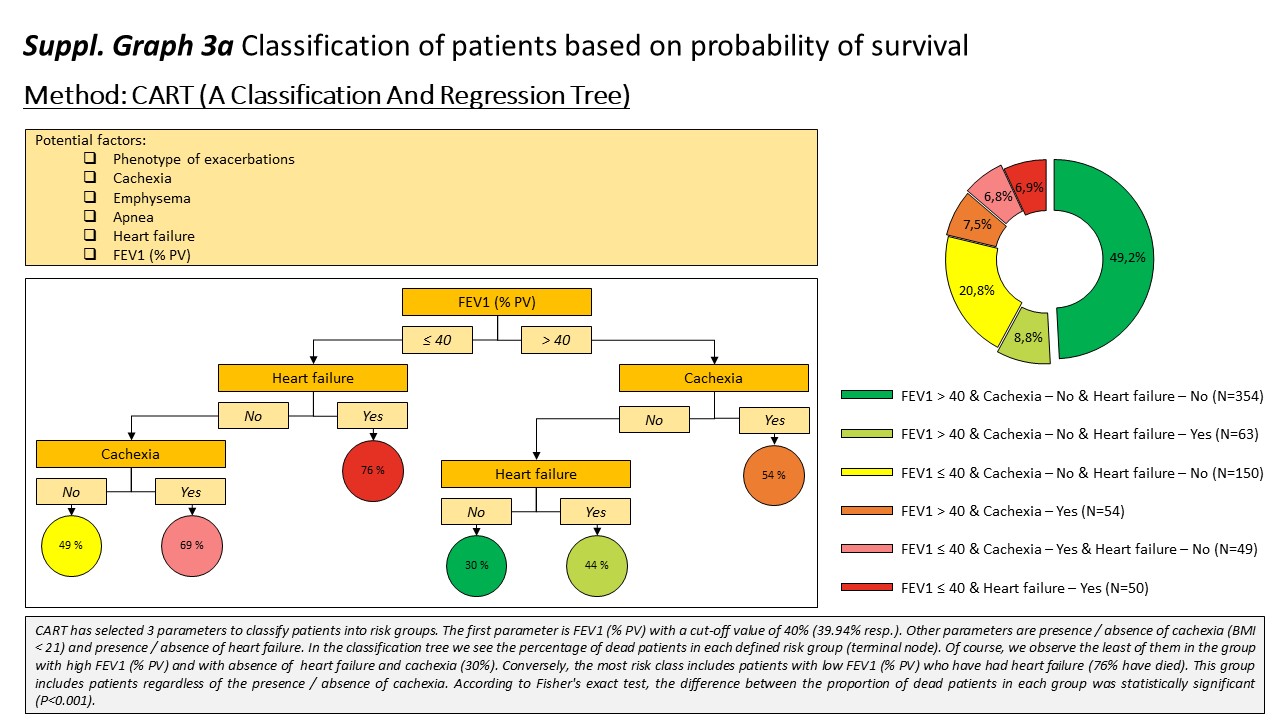
**

**
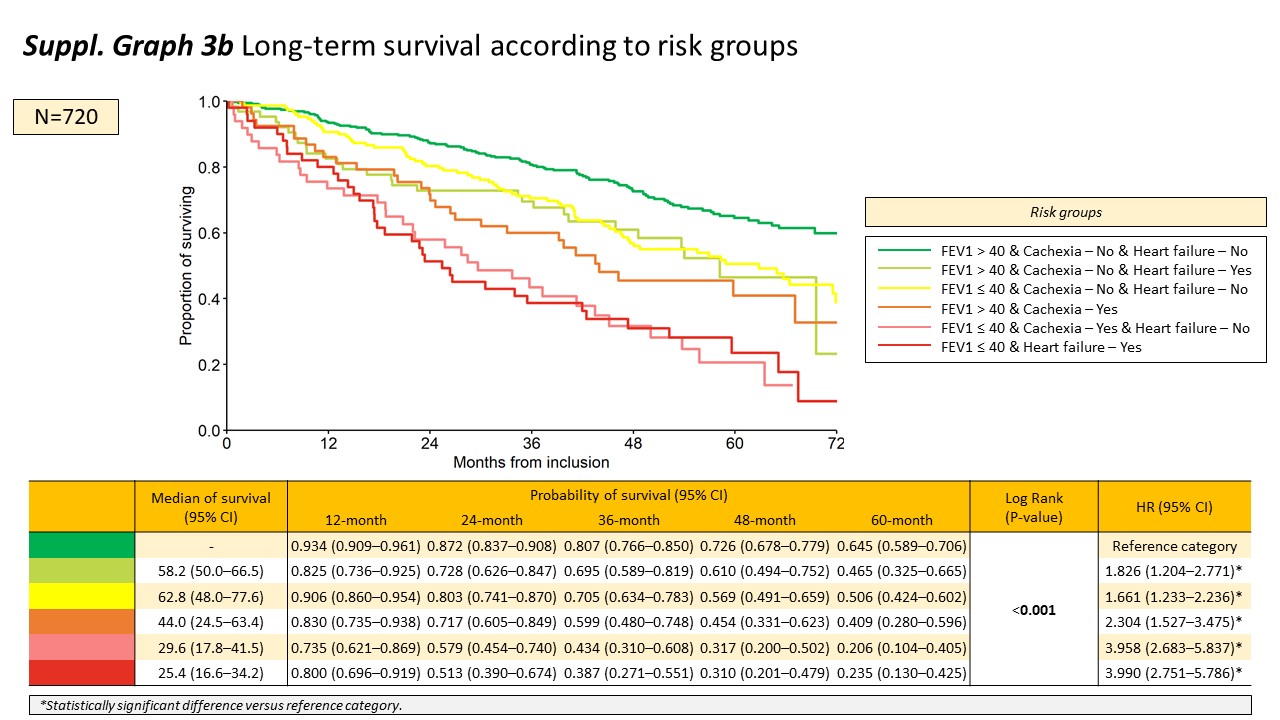
**

**Supplementary Table 1**. Prediction of mortality (univariate and multivariate Cox models – adjusted by age).

|  | Univariate model | | Multivariate model  (adjusted by age) | |
| --- | --- | --- | --- | --- |
|  | HR (95% CI) | P | HR (95% CI) | P |
| GOLD (2–4) (Ref. category = 2) | |  |  |  |
| 3 | 1.565 (1.203–2.036) | **<0.001** | 1.607 (1.235–2.091) | **<0.001** |
| 4 | 2.420 (1.729–3.386) | **<0.001** | 2.786 (1.984–3.913) | **<0.001** |
| GOLD16 (A–D) (Ref. category = A) | |  |  |  |
| B | 1.529 (0.722–3.237) | 0.267 | 1.424 (0.672–3.017) | 0.356 |
| C | 1.498 (0.612–3.666) | 0.376 | 1.543 (0.630–3.776) | 0.342 |
| D | 2.656 (1.313–5.374) | **0.007** | 2.545 (1.257–5.151) | **0.009** |
| GOLD17 (A–D) (Ref. category = A) | |  |  |  |
| B | 1.932 (1.136–3.284) | **0.015** | 1.751 (1.029–2.978) | **0.039** |
| C | 2.628 (0.954–7.239) | 0.062 | 2.079 (0.754–5.734) | 0.158 |
| D | 2.769 (1.623–4.725) | **<0.001** | 2.541 (1.489–4.337) | **<0.001** |
| Spanish phenotypes (Ref. category = ACO) | |  |  |  |
| NE | 1.195 (0.802–1.781) | 0.381 | 1.115 (0.748–1.662) | 0.593 |
| AE CB | 1.787 (1.155–2.766) | **0.009** | 1.630 (1.053–2.525) | **0.028** |
| AE NON-CB | 2.001 (1.200–3.337) | **0.008** | 1.754 (1.051–2.928) | **0.031** |
| Czech phenotypes (Ref. category = Without phenotype) | | |  |  |
| Bronchitic | 1.114 (0.886–1.401) | 0.357 | 1.071 (0.851–1.348) | 0.559 |
| Emphysematous | 1.786 (1.111–2.871) | **0.017** | 1.902 (1.181–3.061) | **0.008** |
| BCO | 1.425 (1.006–2.019) | **0.046** | 1.422 (1.004–2.015) | **0.047** |
| ACO | 0.170 (0.042–0.682) | **0.012** | 0.192 (0.048–0.773) | **0.020** |
| Frequent exacerbator | 1.580 (1.255–1.989) | **<0.001** | 1.546 (1.228–1.946) | **<0.001** |
| Cachexia | 2.262 (1.726–2.965) | **<0.001** | 2.251 (1.717–2.952) | **<0.001** |
| Emphysema and Cachexia | 2.156 (1.505–3.088) | **<0.001** | 2.259 (1.576–3.236) | **<0.001** |
| Emphysema and Cachexia and Frequent Exacerbator | 3.075 (1.928–4.905) | **<0.001** | 3.222 (2.019–5.140) | **<0.001** |
| Risk groups (Ref. category = FEV1 >40 & Cachexia=no & HF=no) | | | | |
| FEV1 >40 & Cachexia=no & HF=yes | 1.826 (1.204–2.771) | **0.005** | 1.711 (1.127–2.598) | **0.012** |
| FEV1 ≤40 & Cachexia=no & HF=no | 1.661 (1.233–2.236) | **<0.001** | 1.715 (1.273–2.310) | **<0.001** |
| FEV1 >40 & Cachexia=yes | 2.304 (1.527–3.475) | **<0.001** | 2.248 (1.489–3.392) | **<0.001** |
| FEV1 ≤40 & Cachexia=yes & HF=no | 3.958 (2.683–5.837) | **<0.001** | 4.088 (2.770–6.034) | **<0.001** |
| FEV1 ≤40 & HF=yes | 3.990 (2.751–5.786) | **<0.001** | 3.764 (2.595–5.461) | **<0.001** |

**Footnote:** Statistically significant differences are in bold.

GOLD = Global Initiative for Chronic Obstructive Lung Disease; ACO = Asthma/COPD Overlap; AE CB = Exacerbator with Chronic Bronchitis; AE non-CB = Exacerbator with Emphysema; BCO = Bronchiectases/COPD Overlap; FEV1 = Forced Expiratory Volume in 1 Second

**Supplementary Table 2**. Prediction of mortality (univariate and multivariate Cox models – adjusted by sex and age)

|  | Univariate model | | Multivariate model  (adjusted by age) | |
| --- | --- | --- | --- | --- |
|  | HR (95% CI) | P | HR (95% CI) | P |
| GOLD (2–4) (Ref. category = 2) | |  |  |  |
| 3 | 1.565 (1.203–2.036) | **<0.001** | 1.614 (1.240–2.100) | **<0.001** |
| 4 | 2.420 (1.729–3.386) | **<0.001** | 2.758 (1.963–3.877) | **<0.001** |
| GOLD16 (A–D) (Ref. category = A) | |  |  |  |
| B | 1.529 (0.722–3.237) | 0.267 | 1.411 (0.666–2.991) | 0.368 |
| C | 1.498 (0.612–3.666) | 0.376 | 1.522 (0.622–3.726) | 0.358 |
| D | 2.656 (1.313–5.374) | **0.007** | 2.537 (1.253–5.135) | **0.010** |
| GOLD17 (A–D) (Ref. category = A) | |  |  |  |
| B | 1.932 (1.136–3.284) | **0.015** | 1.743 (1.025–2.966) | **0.040** |
| C | 2.628 (0.954–7.239) | 0.062 | 2.054 (0.745–5.666) | 0.164 |
| D | 2.769 (1.623–4.725) | **<0.001** | 2.564 (1.502–4.378) | **<0.001** |
| Spanish phenotypes (Ref. category = ACO) | |  |  |  |
| NE | 1.195 (0.802–1.781) | 0.381 | 1.100 (0.737–1.640) | 0.642 |
| AE CB | 1.787 (1.155–2.766) | **0.009** | 1.609 (1.038–2.492) | **0.033** |
| AE NON-CB | 2.001 (1.200–3.337) | **0.008** | 1.748 (1.047–2.917) | **0.033** |
| Czech phenotypes (Ref. category = Without phenotype) | | |  |  |
| Bronchitic | 1.114 (0.886–1.401) | 0.357 | 1.064 (0.845–1.339) | 0.598 |
| Emphysematous | 1.786 (1.111–2.871) | **0.017** | 1.945 (1.205–3.139) | **0.006** |
| BCO | 1.425 (1.006–2.019) | **0.046** | 1.427 (1.007–2.022) | **0.045** |
| ACO | 0.170 (0.042–0.682) | **0.012** | 0.197 (0.049–0.794) | **0.022** |
| Frequent exacerbator | 1.580 (1.255–1.989) | **<0.001** | 1.553 (1.233–1.955) | **<0.001** |
| Cachexia | 2.262 (1.726–2.965) | **<0.001** | 2.455 (1.855–3.250) | **<0.001** |
| Emphysema and Cachexia | 2.156 (1.505–3.088) | **<0.001** | 2.522 (1.741–3.654) | **<0.001** |
| Emphysema and Cachexia and Frequent Exacerbator | 3.075 (1.928–4.905) | **<0.001** | 3.623 (2.244–5.850) | **<0.001** |
| Risk groups (Ref. category = FEV1 >40 & Cachexia=no & CHF=no) | | | | |
| FEV1 >40 & Cachexia=no & CHF=yes | 1.826 (1.204–2.771) | **0.005** | 1.704 (1.122–2.586) | **0.012** |
| FEV1 ≤40 & Cachexia=no & CHF=no | 1.661 (1.233–2.236) | **<0.001** | 1.705 (1.266–2.297) | **<0.001** |
| FEV1 >40 & Cachexia=yes | 2.304 (1.527–3.475) | **<0.001** | 2.407 (1.578–3.672) | **<0.001** |
| FEV1 ≤40 & Cachexia=yes & CHF=no | 3.958 (2.683–5.837) | **<0.001** | 4.220 (2.852–6.244) | **<0.001** |
| FEV1 ≤40 & CHF=yes | 3.990 (2.751–5.786) | **<0.001** | 3.648 (2.509–5.303) | **<0.001** |

**Footnote:** Statistically significant differences are in bold.

GOLD = Global Initiative for Chronic Obstructive Lung Disease; ACO = Asthma/COPD Overlap; AE CB = Exacerbator with Chronic Bronchitis; AE non-CB = Exacerbator with Emphysema; BCO = Bronchiectases/COPD Overlap; FEV1 = Forced Expiratory Volume in 1 Second
